# Supplementary material for: (E)-4-Methyl-N-((quinolin-2-yl)ethylidene)aniline as ligand for IIB supramolecular complexes: synthesis, structure, aggregation-induced emission enhancement and application in PMMA-doped hybrid material
Source: Royal Society of Chemistry journal article supplement (doi:10.1039/c6dt03853k), 2016-11-17
Supplement: c6dt03853k1.pdf [file c6dt03853k1.pdf]

## Supporting Information

### **(E)-4-Methyl-N-((Quinoline-2-yl)ethylidene)aniline as Ligand for IIB Supramolecular Complexes: Synthesis, Structure, Aggregation Induced Emission Enhancement and Application in PMMA-Doped Hybrid Material**

Ani Wang,<sup>a</sup> Ruiqing Fan,<sup>\*,a</sup> Yuwei Dong,<sup>a</sup> Wei Chen,<sup>a</sup> Yang Song,<sup>a</sup> Ping Wang,<sup>a</sup> Sue Hao,<sup>a</sup> Zhigang Liu<sup>a</sup> and Yulin Yang<sup>\*,a</sup>

*<sup>a</sup> MIIT Key Laboratory of Critical Materials Technology for New Energy Conversion and Storage,  
School of Chemistry and Chemical Engineering, Harbin Institute of Technology, Harbin 150001,  
P. R. of China*

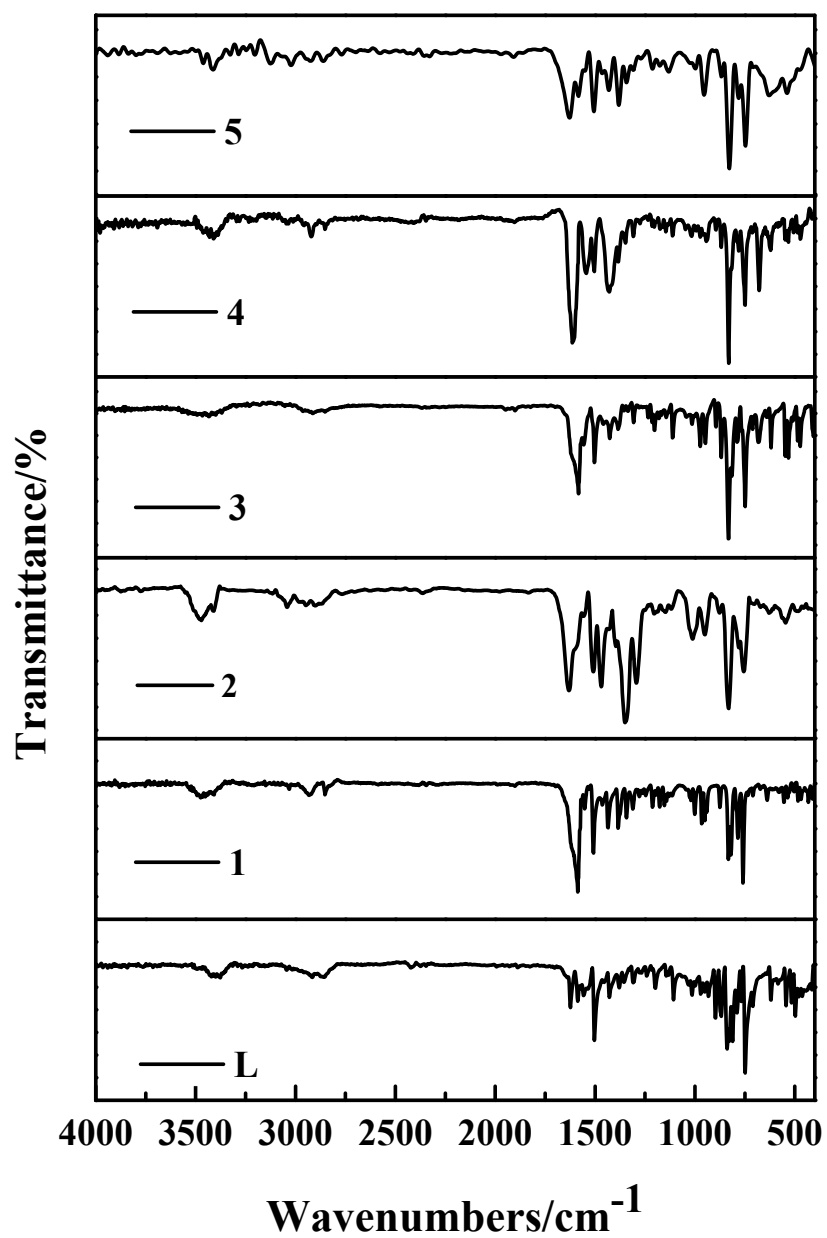

Fig. S1 Infrared spectra of ligand L and complexes 1–5 recorded from a KBr pellet.

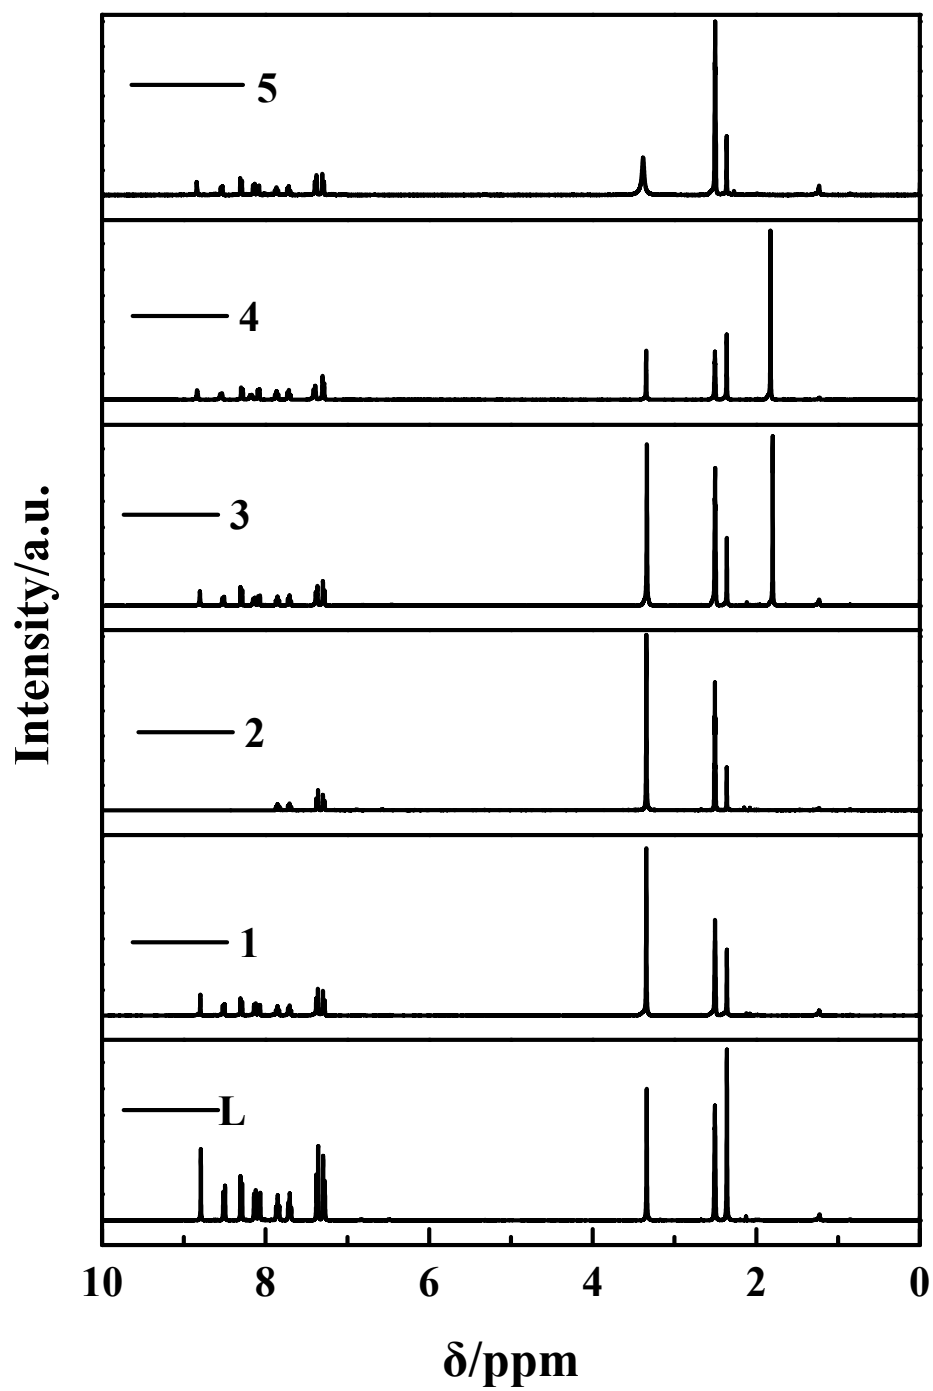

Fig. S2 <sup>1</sup>H NMR spectra of ligand L and complexes 1–5.

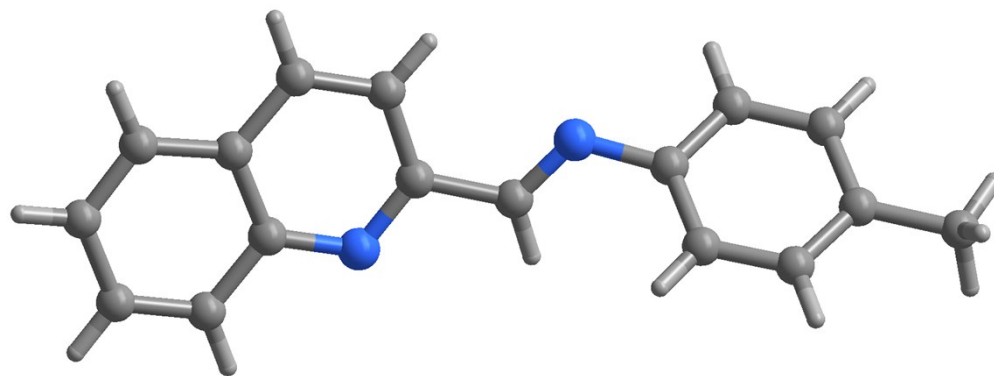

**Fig. S3** Crystal structure of **L**.

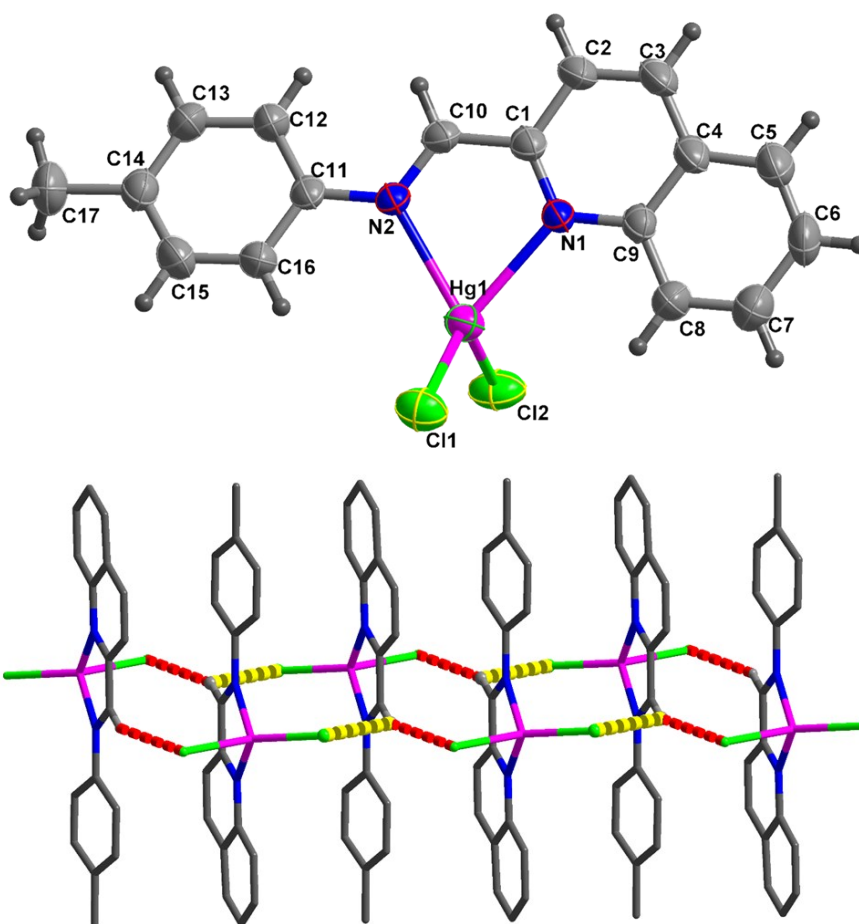

**Fig. S4** View of the structure (1D chain) of complex **5**. Dotted lines represent the weak interactions.

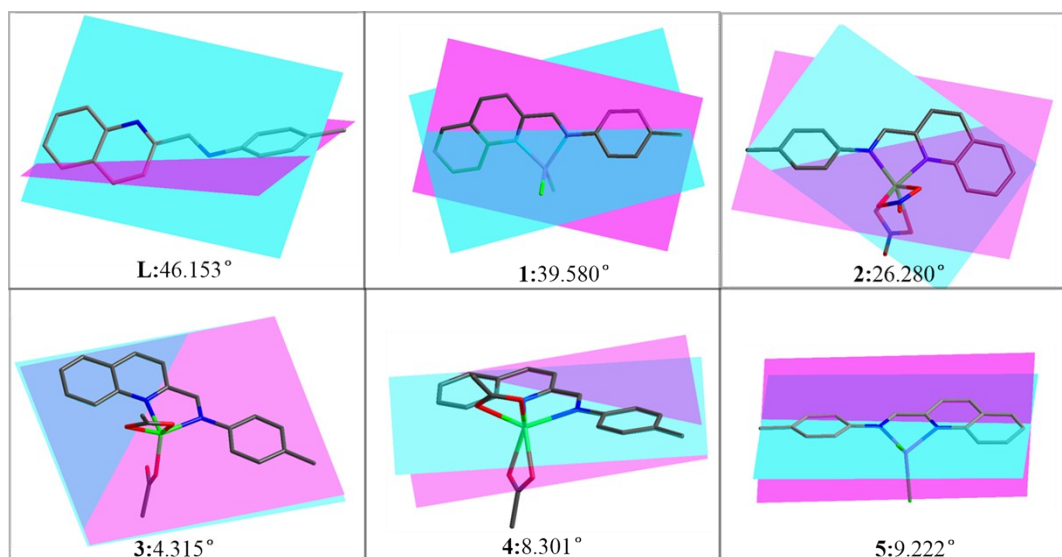

**Fig. S5** Dihedral angles of **L** and complexes **1–5** between the quinoline and benzene rings.

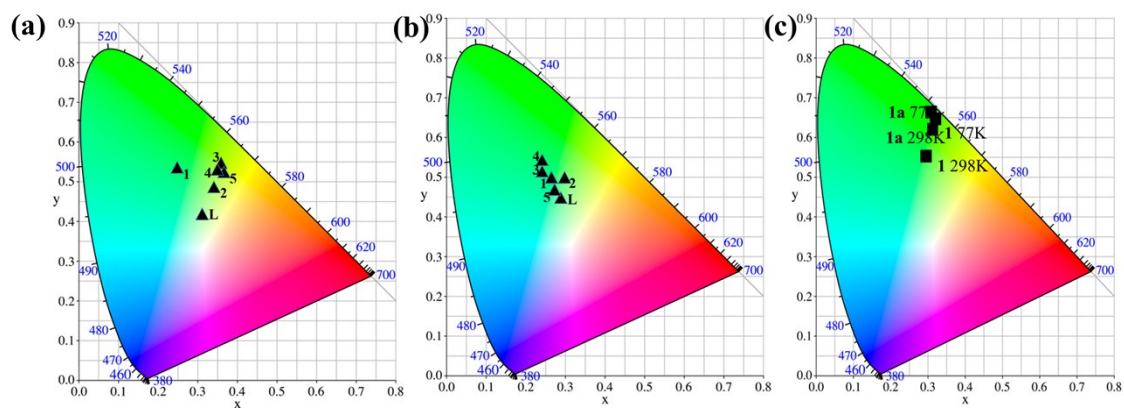

**Fig. S6** CIE chromaticity diagram (1931 CIE standard) for **L** and complexes **1–5** (a) in the crystal state at 298 K (b) acetonitrile solution at 298K (c) in the crystal state and powder state at 77 K and 298 K.

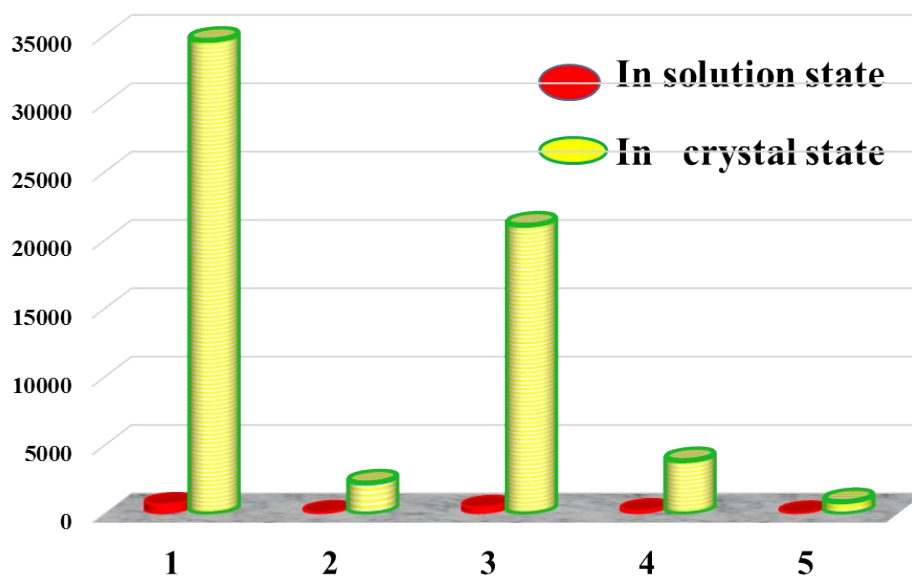

**Fig. S7** The comparison of emission spectra of the complexes 1–5 in CH<sub>3</sub>CN solution and crystal state at 298K, upon excitation with 365 nm.

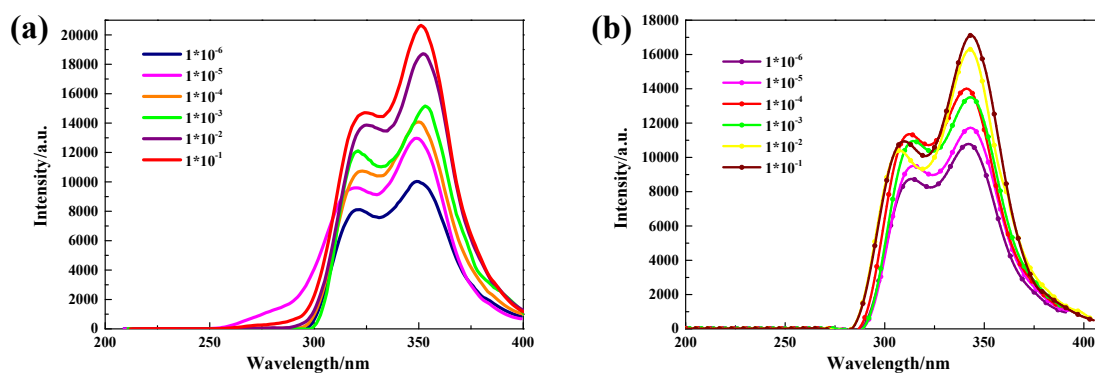

**Fig. S8** The excitation spectra of **1** and **3** in different concentrations of CH<sub>3</sub>CN.

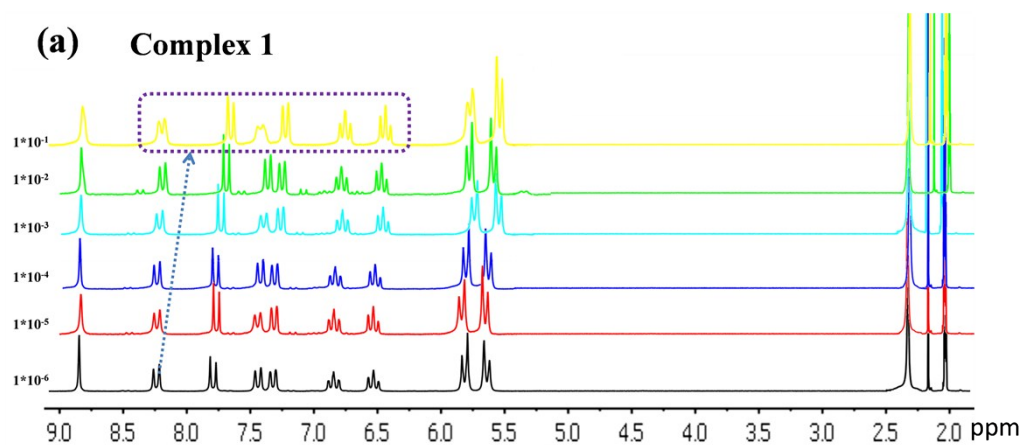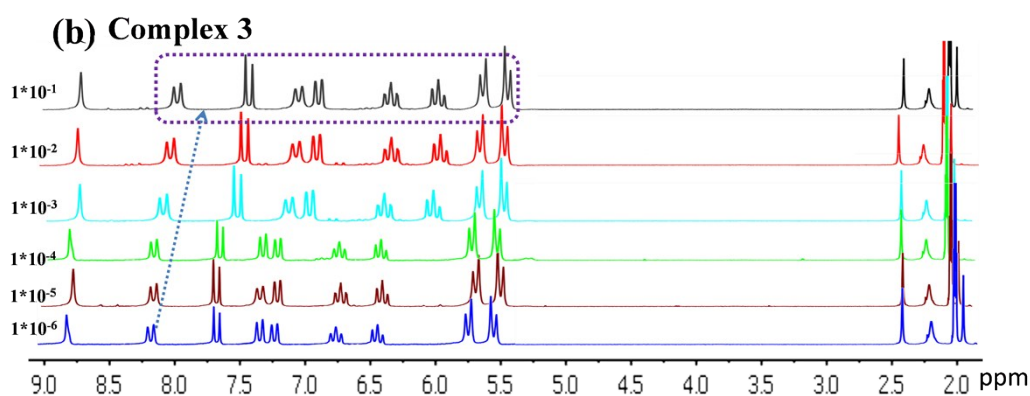

**Fig. S9**  $^1\text{H}$  NMR study of (a) complex 1 (b) 3 at varying concentrations ( $\text{CD}_3\text{CN}$ , 298 K).

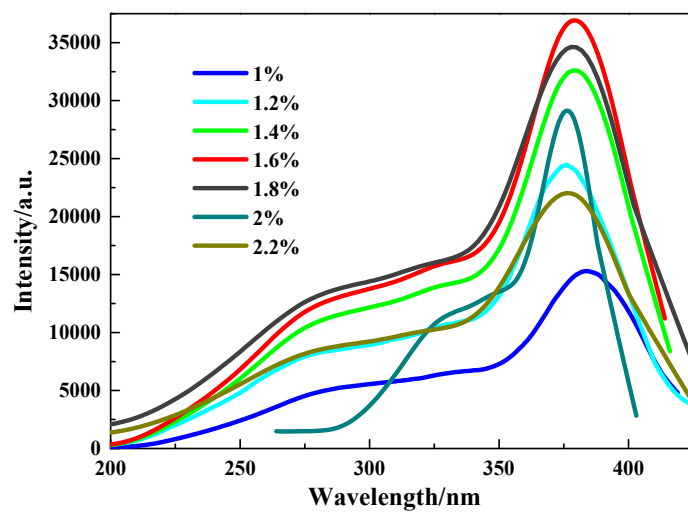

**Fig. S10** Excitation spectra of these 1-PMMA films in different dopant concentrations.

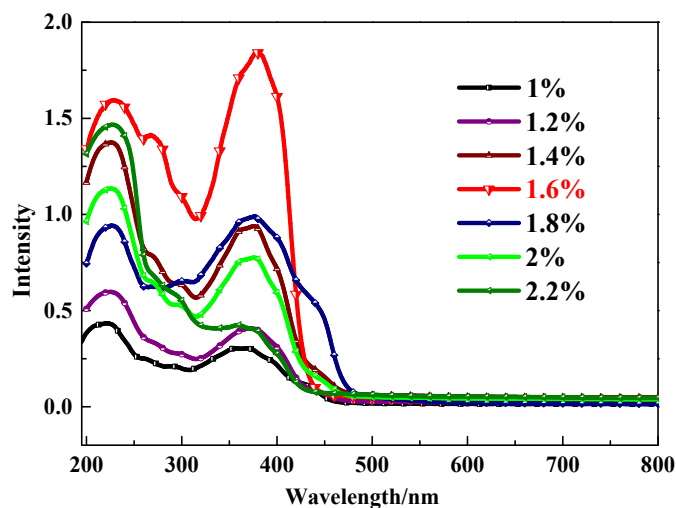

**Fig. S11** UV-vis absorption spectra of the 1-PMMA films in different dopant concentrations in the solid state at room temperature.

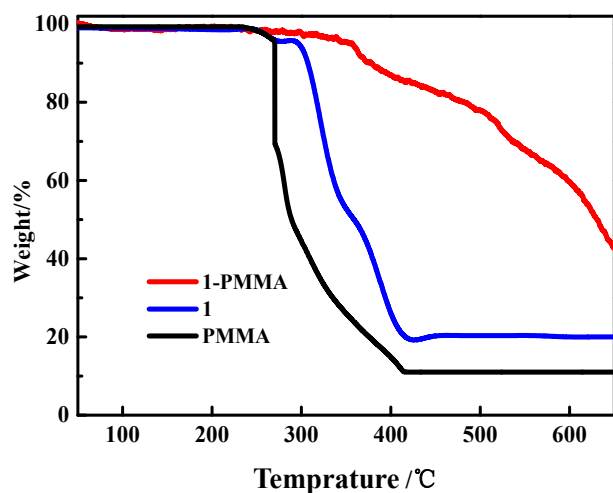

**Fig. S12** The comparison TG curves of pure 1, PMMA, and 1-PMMA

**Table S1.** Selected bond distances (Å) and angles (°) for complexes 1 and 5.

| Parameter         | 1          | Parameter         | 5          |
|-------------------|------------|-------------------|------------|
| Zn(1)-N(1)        | 2.056(9)   | Hg(1)-N(1)        | 2.334(5)   |
| Zn(1)-N(2)        | 2.070(9)   | Hg(1)-N(2)        | 2.369(5)   |
| Zn(1)-Cl(1)       | 2.199(4)   | Hg(1)-Cl(1)       | 2.3678(19) |
| Zn(1)-Cl(2)       | 2.188(4)   | Hg(1)-Cl(2)       | 2.4239(19) |
| N(2)-C(10)        | 1.286(13)  | N(2)-C(10)        | 1.283(8)   |
| N(1)-Zn(1)-N(2)   | 79.8(3)    | N(1)-Hg(1)-N(2)   | 72.34(18)  |
| N(1)-Zn(1)-Cl(2)  | 119.0(3)   | N(1)-Hg(1)-Cl(1)  | 125.43(14) |
| N(1)-Zn(1)-Cl(1)  | 108.4(3)   | N(1)-Hg(1)-Cl(2)  | 105.26(14) |
| N(2)-Zn(1)-Cl(2)  | 118.0(3)   | N(2)-Hg(1)-Cl(2)  | 110.46(13) |
| N(2)-Zn(1)-Cl(1)  | 110.4(3)   | N(2)-Hg(1)-Cl(1)  | 119.29(14) |
| Cl(2)-Zn(1)-Cl(1) | 115.86(16) | Cl(1)-Hg(1)-Cl(2) | 116.23(7)  |



|                  |          |                  |          |
|------------------|----------|------------------|----------|
| C(1)-N(1)-Zn(1)  | 114.2(7) | C(1)-N(1)-Hg(1)  | 113.6(4) |
| C(9)-N(1)-Zn(1)  | 127.0(7) | C(9)-N(1)-Hg(1)  | 126.1(4) |
| C(10)-N(2)-Zn(1) | 112.2(7) | C(10)-N(2)-Hg(1) | 112.8(4) |
| C(11)-N(2)-Zn(1) | 126.6(7) | C(11)-N(2)-Hg(1) | 125.3(4) |

**Table S2.** Selected bond distances (Å) and angles (°) for **2**, **3** and **4**.

| <b>2</b>         |            |                  |            |
|------------------|------------|------------------|------------|
| Parameter        |            | Parameter        |            |
| N(2)-C(10)       | 1.274(3)   | N(2)-Zn(1)-O(6)  | 148.03(8)  |
| Zn(1)-N(1)       | 2.0702(17) | O(2)-Zn(1)-O(6)  | 84.81(9)   |
| Zn(1)-O(5)       | 2.082(2)   | O(3)-Zn(1)-O(6)  | 90.88(9)   |
| Zn(1)-N(2)       | 2.0968(19) | N(1)-Zn(1)-N(3)  | 119.80(7)  |
| Zn(1)-O(2)       | 2.127(2)   | O(5)-Zn(1)-N(3)  | 121.80(7)  |
| Zn(1)-O(3)       | 2.248(3)   | N(2)-Zn(1)-N(3)  | 117.62(7)  |
| Zn(1)-O(6)       | 2.345(3)   | O(2)-Zn(1)-N(3)  | 29.06(7)   |
| Zn(1)-N(3)       | 2.602(2)   | O(3)-Zn(1)-N(3)  | 28.58(7)   |
| Zn(1)-N(4)       | 2.620(2)   | O(6)-Zn(1)-N(3)  | 87.08(8)   |
| N(1)-Zn(1)-O(5)  | 113.08(8)  | N(1)-Zn(1)-N(4)  | 112.45(7)  |
| N(1)-Zn(1)-N(2)  | 81.22(7)   | O(5)-Zn(1)-N(4)  | 28.20(7)   |
| O(5)-Zn(1)-N(2)  | 91.99(8)   | N(2)-Zn(1)-N(4)  | 120.13(7)  |
| N(1)-Zn(1)-O(2)  | 148.15(8)  | O(2)-Zn(1)-N(4)  | 90.57(8)   |
| O(5)-Zn(1)-O(2)  | 97.67(9)   | O(3)-Zn(1)-N(4)  | 117.01(9)  |
| N(2)-Zn(1)-O(2)  | 106.73(8)  | O(6)-Zn(1)-N(4)  | 28.30(7)   |
| N(1)-Zn(1)-O(3)  | 91.46(7)   | N(3)-Zn(1)-N(4)  | 105.04(6)  |
| O(5)-Zn(1)-O(3)  | 142.43(8)  | N(3)-O(2)-Zn(1)  | 96.64(16)  |
| N(2)-Zn(1)-O(3)  | 120.65(9)  | N(3)-O(3)-Zn(1)  | 91.69(17)  |
| O(2)-Zn(1)-O(3)  | 57.64(8)   | N(4)-O(5)-Zn(1)  | 100.38(16) |
| N(1)-Zn(1)-O(6)  | 104.85(8)  | N(4)-O(6)-Zn(1)  | 88.22(17)  |
| O(1)-Zn(1)-N(2)  | 94.02(12)  | N(4)-Zn(2)-C(41) | 123.11(13) |
| C(9)-N(1)-Zn(1)  | 129.61(15) | C(11)-N(2)-Zn(1) | 127.68(14) |
| C(10)-N(2)-Zn(1) | 110.43(15) | O(1)-N(3)-Zn(1)  | 175.3(2)   |
| O(2)-N(3)-Zn(1)  | 54.30(13)  | O(3)-N(3)-Zn(1)  | 59.73(14)  |
| O(4)-N(4)-Zn(1)  | 171.9(2)   | O(6)-N(4)-Zn(1)  | 63.47(16)  |
| O(5)-N(4)-Zn(1)  | 51.41(12)  |                  |            |
| <b>3</b>         |            |                  |            |
| Parameter        |            | Parameter        |            |
| N(2)-C(10)       | 1.270(4)   | C(20)-O(3)-Zn(1) | 115.1(3)   |
| O(12)-Zn(3)      | 2.324(4)   | C(39)-O(5)-Zn(2) | 111.4(3)   |
| O(11)-Zn(3)      | 2.037(3)   | O(8)-C(41)-Zn(2) | 70.5(3)    |
| O(10)-Zn(3)      | 1.925(3)   | O(7)-C(41)-Zn(2) | 50.8(2)    |
| C(62)-Zn(3)      | 2.529(5)   | C(43)-N(5)-Zn(3) | 112.3(2)   |
| O(8)-Zn(2)       | 2.435(4)   | C(51)-N(5)-Zn(3) | 128.7(2)   |
| O(7)-Zn(2)       | 2.014(3)   | C(53)-N(6)-Zn(3) | 127.8(2)   |
| Zn(1)-O(3)       | 1.921(3)   | C(52)-N(6)-Zn(3) | 111.4(2)   |

|                   |            |                   |            |
|-------------------|------------|-------------------|------------|
| Zn(1)-O(1)        | 2.056(3)   | C(18)-O(2)-Zn(1)  | 85.8(3)    |
| Zn(1)-N(1)        | 2.087(3)   | C(32)-N(4)-Zn(2)  | 127.5(2)   |
| Zn(1)-N(2)        | 2.142(3)   | O(5)-Zn(2)-N(3)   | 133.05(13) |
| Zn(1)-O(2)        | 2.311(4)   | O(7)-Zn(2)-N(3)   | 118.33(13) |
| Zn(1)-C(18)       | 2.534(4)   | O(5)-Zn(2)-N(4)   | 110.50(16) |
| Zn(2)-O(5)        | 1.939(3)   | O(7)-Zn(2)-N(4)   | 96.42(12)  |
| Zn(2)-N(3)        | 2.092(3)   | N(3)-Zn(2)-N(4)   | 79.45(12)  |
| Zn(2)-N(4)        | 2.134(3)   | O(5)-Zn(2)-O(8)   | 96.32(17)  |
| Zn(2)-C(41)       | 2.554(5)   | O(7)-Zn(2)-O(8)   | 56.50(12)  |
| Zn(3)-N(5)        | 2.085(3)   | N(3)-Zn(2)-O(8)   | 96.40(13)  |
| Zn(3)-N(6)        | 2.134(3)   | N(4)-Zn(2)-O(8)   | 146.98(13) |
| O(3)-Zn(1)-N(1)   | 129.23(14) | O(5)-Zn(2)-C(41)  | 102.13(15) |
| O(1)-Zn(1)-N(1)   | 120.29(12) | O(7)-Zn(2)-C(41)  | 28.48(13)  |
| O(3)-Zn(1)-N(2)   | 113.73(16) | N(3)-Zn(2)-C(41)  | 109.94(14) |
| O(1)-Zn(1)-N(2)   | 94.02(12)  | N(4)-Zn(2)-C(41)  | 123.11(13) |
| N(1)-Zn(1)-N(2)   | 79.46(12)  | O(8)-Zn(2)-C(41)  | 28.04(12)  |
| O(3)-Zn(1)-O(2)   | 95.79(17)  | O(10)-Zn(3)-O(11) | 105.34(13) |
| O(1)-Zn(1)-O(2)   | 58.14(12)  | O(10)-Zn(3)-N(5)  | 130.90(12) |
| N(1)-Zn(1)-O(2)   | 96.30(13)  | O(11)-Zn(3)-N(5)  | 122.08(12) |
| N(2)-Zn(1)-O(2)   | 145.24(12) | O(10)-Zn(3)-N(6)  | 109.33(14) |
| O(3)-Zn(1)-C(18)  | 103.15(14) | O(11)-Zn(3)-N(6)  | 95.99(12)  |
| O(1)-Zn(1)-C(18)  | 29.39(12)  | N(5)-Zn(3)-N(6)   | 79.48(11)  |
| N(1)-Zn(1)-C(18)  | 110.68(13) | O(10)-Zn(3)-O(12) | 97.23(16)  |
| N(2)-Zn(1)-C(18)  | 121.07(12) | O(11)-Zn(3)-O(12) | 58.08(12)  |
| N(6)-Zn(3)-O(12)  | 147.50(13) | N(5)-Zn(3)-O(12)  | 97.34(12)  |
| O(10)-Zn(3)-C(62) | 102.75(13) | C(1)-N(1)-Zn(1)   | 112.3(2)   |
| O(11)-Zn(3)-C(62) | 29.34(13)  | C(9)-N(1)-Zn(1)   | 128.5(3)   |
| N(5)-Zn(3)-C(62)  | 112.09(12) | C(42)-C(41)-Zn(2) | 169.1(4)   |
| N(6)-Zn(3)-C(62)  | 123.14(13) | C(10)-N(2)-Zn(1)  | 111.2(3)   |
| O(12)-Zn(3)-C(62) | 28.74(12)  | C(11)-N(2)-Zn(1)  | 127.3(2)   |
| C(18)-O(1)-Zn(1)  | 97.0(3)    | C(31)-N(4)-Zn(2)  | 111.5(3)   |

4

| Parameter  |           | Parameter         |          |
|------------|-----------|-------------------|----------|
| N(2)-C(10) | 1.292(10) | O(5)-C(39)-Cd(2)  | 58.7(5)  |
| Cd(1)-O(3) | 2.283(6)  | O(6)-C(39)-Cd(2)  | 60.5(5)  |
| Cd(1)-O(1) | 2.291(7)  | C(40)-C(39)-Cd(2) | 175.9(6) |
| Cd(1)-N(1) | 2.313(7)  | O(12)-C(62)-Cd(3) | 62.4(5)  |
| Cd(1)-N(2) | 2.338(7)  | O(11)-C(62)-Cd(3) | 58.3(4)  |
| Cd(1)-O(2) | 2.364(6)  | C(63)-C(62)-Cd(3) | 172.4(7) |
| Cd(1)-O(4) | 2.372(7)  | O(3)-Cd(1)-O(1)   | 99.2(2)  |
| Cd(2)-O(7) | 2.281(7)  | O(3)-Cd(1)-N(1)   | 140.8(2) |
| Cd(2)-O(5) | 2.303(6)  | O(1)-Cd(1)-N(1)   | 120.0(2) |
| Cd(2)-N(3) | 2.333(7)  | O(3)-Cd(1)-N(2)   | 106.8(2) |

|                   |          |                   |          |
|-------------------|----------|-------------------|----------|
| Cd(2)-O(6)        | 2.341(6) | O(1)-Cd(1)-N(2)   | 94.6(2)  |
| Cd(2)-N(4)        | 2.355(7) | N(1)-Cd(1)-N(2)   | 72.5(2)  |
| Cd(2)-O(8)        | 2.368(8) | O(3)-Cd(1)-O(2)   | 106.8(3) |
| Cd(3)-O(11)       | 2.284(6) | O(1)-Cd(1)-O(2)   | 55.1(2)  |
| Cd(3)-O(9)        | 2.303(6) | N(1)-Cd(1)-O(2)   | 96.3(2)  |
| Cd(3)-N(5)        | 2.309(6) | N(2)-Cd(1)-O(2)   | 137.7(3) |
| Cd(3)-N(6)        | 2.347(6) | O(3)-Cd(1)-O(4)   | 55.0(2)  |
| Cd(3)-O(10)       | 2.348(6) | O(1)-Cd(1)-O(4)   | 145.0(3) |
| Cd(3)-O(12)       | 2.375(6) | N(1)-Cd(1)-O(4)   | 88.7(2)  |
| O(4)-Cd(1)-C(18)  | 128.3(3) | N(2)-Cd(1)-O(4)   | 114.2(2) |
| O(3)-Cd(1)-C(20)  | 27.8(2)  | O(2)-Cd(1)-O(4)   | 105.9(3) |
| O(1)-Cd(1)-C(20)  | 122.7(3) | O(3)-Cd(1)-C(18)  | 105.2(3) |
| N(1)-Cd(1)-C(20)  | 115.4(3) | O(1)-Cd(1)-C(18)  | 27.7(2)  |
| N(2)-Cd(1)-C(20)  | 115.3(2) | N(1)-Cd(1)-C(18)  | 109.6(2) |
| C(18)-Cd(1)-C(20) | 118.1(3) | O(7)-Cd(2)-O(8)   | 53.8(2)  |
| O(7)-Cd(2)-O(5)   | 103.5(3) | O(5)-Cd(2)-O(8)   | 151.5(3) |
| O(7)-Cd(2)-N(3)   | 141.1(3) | N(3)-Cd(2)-O(8)   | 89.0(2)  |
| O(5)-Cd(2)-N(3)   | 115.4(2) | O(6)-Cd(2)-O(8)   | 109.1(3) |
| O(7)-Cd(2)-O(6)   | 103.9(3) | N(4)-Cd(2)-O(8)   | 109.5(3) |
| O(5)-Cd(2)-O(6)   | 55.3(2)  | O(7)-Cd(2)-C(39)  | 106.2(3) |
| N(3)-Cd(2)-O(6)   | 98.2(2)  | O(5)-Cd(2)-C(39)  | 27.4(2)  |
| O(7)-Cd(2)-N(4)   | 107.2(3) | N(3)-Cd(2)-C(39)  | 108.2(2) |
| O(5)-Cd(2)-N(4)   | 92.8(2)  | O(6)-Cd(2)-C(39)  | 27.9(2)  |
| N(3)-Cd(2)-N(4)   | 72.1(2)  | N(4)-Cd(2)-C(39)  | 116.8(2) |
| O(6)-Cd(2)-N(4)   | 139.9(2) | O(8)-Cd(2)-C(39)  | 133.5(3) |
| O(7)-Cd(2)-C(41)  | 26.9(2)  | O(10)-Cd(3)-O(12) | 104.6(2) |
| O(5)-Cd(2)-C(41)  | 128.2(3) | O(11)-Cd(3)-C(60) | 105.3(3) |
| N(3)-Cd(2)-C(41)  | 115.4(3) | O(9)-Cd(3)-C(60)  | 27.6(2)  |
| O(6)-Cd(2)-C(41)  | 107.5(3) | N(5)-Cd(3)-C(60)  | 112.0(2) |
| N(4)-Cd(2)-C(41)  | 111.7(2) | N(6)-Cd(3)-C(60)  | 118.7(2) |
| O(8)-Cd(2)-C(41)  | 26.8(2)  | O(10)-Cd(3)-C(60) | 27.9(2)  |
| C(60)-O(9)-Cd(3)  | 93.2(5)  | O(12)-Cd(3)-C(60) | 126.4(2) |
| C(62)-O(12)-Cd(3) | 90.2(5)  | O(11)-Cd(3)-C(62) | 28.1(2)  |
| C(62)-O(11)-Cd(3) | 93.7(5)  | O(9)-Cd(3)-C(62)  | 121.3(3) |
| C(53)-N(6)-Cd(3)  | 124.0(5) | N(5)-Cd(3)-C(62)  | 115.0(3) |
| C(10)-N(2)-Cd(1)  | 114.4(5) | N(6)-Cd(3)-C(62)  | 112.8(2) |
| C(11)-N(2)-Cd(1)  | 124.8(5) | O(10)-Cd(3)-C(62) | 107.5(2) |
| O(4)-Cd(1)-C(20)  | 27.3(2)  | O(12)-Cd(3)-C(62) | 27.5(2)  |
| C(22)-N(3)-Cd(2)  | 114.7(5) | C(60)-Cd(3)-C(62) | 117.7(3) |
| C(30)-N(3)-Cd(2)  | 126.4(5) | C(18)-O(1)-Cd(1)  | 93.6(5)  |
| O(2)-Cd(1)-C(18)  | 27.4(2)  | C(18)-O(2)-Cd(1)  | 90.5(6)  |
| C(31)-N(4)-Cd(2)  | 113.4(5) | C(20)-O(3)-Cd(1)  | 93.8(5)  |
| C(32)-N(4)-Cd(2)  | 123.8(5) | C(20)-O(4)-Cd(1)  | 90.3(6)  |
| C(53)-N(6)-Cd(3)  | 124.0(5) | C(39)-O(5)-Cd(2)  | 93.9(5)  |

|                   |          |                  |         |
|-------------------|----------|------------------|---------|
| C(43)-N(5)-Cd(3)  | 115.1(5) | C(39)-O(6)-Cd(2) | 91.6(5) |
| C(60)-O(10)-Cd(3) | 90.8(5)  | C(41)-O(8)-Cd(2) | 91.9(6) |
| C(52)-N(6)-Cd(3)  | 113.6(5) |                  |         |

---

**Table S3.** The geometrical parameters of C–H···O/Cl hydrogen bonding and  $\pi\cdots\pi$  stacking interactions for complexes **1–5**.

|                            | coordination geometry | dihedral angle (deg) <sup>a</sup> | D–H···A                    | D–H/Å  | H···A/Å | D···A/Å | D–H···A/°  | dimension |
|----------------------------|-----------------------|-----------------------------------|----------------------------|--------|---------|---------|------------|-----------|
| <b>1</b>                   | tetrahedral           | 39.6                              | C5–H5A···Cl1               | 0.930  | 2.943   | 3.786   | 151.539(2) | 3D        |
|                            |                       |                                   | C10–H10A···Cl1             | 0.930  | 2.590   | 3.450   | 154.121(2) |           |
|                            |                       |                                   | $\pi_{Cg1}\cdots\pi_{Cg1}$ |        |         | 3.718   |            |           |
| <b>2</b>                   | octahedral            | 29.3                              | C2–H2A···O4                | 0.930  | 2.608   | 3.259   | 127.517(4) | 2D        |
|                            |                       |                                   | C10–H10A···O4              | 0.930  | 2.670   | 3.433   | 139.724(1) |           |
|                            |                       |                                   | C5–H5A···O3                | 0.930  | 2.654   | 3.455   | 144.709(1) |           |
|                            |                       |                                   | $\pi_{Cg1}\cdots\pi_{Cg1}$ |        |         | 3.615   |            |           |
| <b>3</b>                   | trigonal bipyramidal  | 4.3                               | C3–H3A···O1                | 0.9305 | 2.619   | 3.380   | 139.467    | 3D        |
|                            |                       |                                   | C10–H10A···O6              | 0.9312 | 2.3622  | 3.2508  | 159.777    |           |
|                            |                       |                                   | C12–H12A···O6              | 0.9290 | 2.6259  | 3.5139  | 159.908    |           |
|                            |                       |                                   | C17–H17A···O8              | 0.9278 | 2.6870  | 3.5907  | 157.070    |           |
|                            |                       |                                   | C19–H19A···O7              | 0.9302 | 2.6804  | 3.4668  | 139.486    |           |
|                            |                       |                                   | C33–H33A···O4              | 0.9326 | 2.4680  | 3.3881  | 170.200    |           |
|                            |                       |                                   | C38–H38A···O5              | 0.9236 | 2.6753  | 3.5796  | 157.185    |           |
|                            |                       |                                   | C49–H49A···O2              | 0.9308 | 2.4930  | 3.3223  | 148.586    |           |
|                            |                       |                                   | C54–H54A···O9              | 0.9310 | 2.5630  | 3.4460  | 157.364    |           |
|                            |                       |                                   | C63–H63C···O11             | 0.9300 | 2.5954  | 3.3825  | 13.399     |           |
| $\pi_{Cg1}\cdots\pi_{Cg1}$ |                       |                                   | 3.619                      |        |         |         |            |           |
| <b>4</b>                   | octahedral            | 8.3                               | C3–H3A···O9                | 0.9305 | 2.5682  | 3.509   | 142.236    | 3D        |

|              |             |     |           |                                    |        |         |        |          |    |           |       |          |   |         |       |
|--------------|-------------|-----|-----------|------------------------------------|--------|---------|--------|----------|----|-----------|-------|----------|---|---------|-------|
|              |             |     |           | C12–H12A···O1                      | 0.9326 | 2.6346  | 3.3910 | 138.629  |    |           |       |          |   |         |       |
|              |             |     |           | C13–H13A···O3                      | 0.9311 | 2.5600  | 3.3974 | 149.940  |    |           |       |          |   |         |       |
|              |             |     |           | C16–H16A···O8                      | 0.9303 | 2.6061  | 3.5328 | 173.768  |    |           |       |          |   |         |       |
|              |             |     |           | C19–H19C···O5                      | 0.9611 | 2.5828  | 3.5238 | 166.273  |    |           |       |          |   |         |       |
|              |             |     |           | C21–H21B···O10                     | 0.9300 | 2.6777  | 3.5080 | 145.003  |    |           |       |          |   |         |       |
|              |             |     |           | C34–H34A···O11                     | 0.9229 | 2.6098  | 3.3880 | 141.571  |    |           |       |          |   |         |       |
|              |             |     |           | C49–H49A···O6                      | 0.9277 | 2.4813  | 3.3492 | 155.691  |    |           |       |          |   |         |       |
|              |             |     |           | C12–H58A···O12                     | 0.9309 | 2.6493  | 3.5463 | 162.090  |    |           |       |          |   |         |       |
|              |             |     |           | $\pi_{C_{gl}} \cdots \pi_{C_{gl}}$ |        |         | 3.712  |          |    |           |       |          |   |         |       |
| 5            | tetrahedral |     | 9.2       | C10–H10A···Cl2                     | 0.930  | 2.7864  | 3.6377 | 152.670  | 1D |           |       |          |   |         |       |
|              |             |     |           | C10–H10A···Cl1                     | 0.930  | 2.8274  | 3.3080 | 113.346  |    |           |       |          |   |         |       |
|              |             |     |           | $\pi_{C_{gl}} \cdots \pi_{C_{gl}}$ |        |         | 3.735  |          |    |           |       |          |   |         |       |
| <sup>a</sup> | Between     | the | quinoline | ring                               | and    | benzene | ring;  | $C_{gl}$ | =  | quinoline | ring; | $C_{g2}$ | = | benzene | ring; |

**Table S4.** The luminescence data of ligand **L** and complexes **1–5** in different state.

| Complex  | $\lambda_{em}$ (nm) | FWHM (nm) | CIE (x, y) | Conditions              |
|----------|---------------------|-----------|------------|-------------------------|
| <b>L</b> | 521                 | 141.81    | 0.30 0.40  | crystal-298K            |
|          | 515                 | 97.80     | 0.27 0.43  | CH <sub>3</sub> CN-298K |
| <b>1</b> | 518                 | 78.3      | 0.25 0.51  | crystal-298K            |
|          | 520                 | 67.0      | 0.32 0.62  | powder-298K             |
|          | 507                 | 77.32     | 0.26 0.49  | CH <sub>3</sub> CN-298K |
|          | 537                 | 51.4      | 0.34 0.64  | powder-77K              |
|          | 532                 | 61.0      | 0.34 0.65  | crystal -77K            |
| <b>2</b> | 521                 | 101.28    | 0.33 0.45  | crystal-298K            |
|          | 517                 | 92.03     | 0.26 0.49  | CH <sub>3</sub> CN-298K |
| <b>3</b> | 524                 | 98.74     | 0.35 0.53  | crystal-298K            |
|          | 507                 | 61.37     | 0.25 0.48  | CH <sub>3</sub> CN-298K |
| <b>4</b> | 522                 | 87.56     | 0.35 0.52  | crystal-298K            |
|          | 516                 | 77.48     | 0.28 0.52  | CH <sub>3</sub> CN-298K |
| <b>5</b> | 519                 | 77.29     | 0.32 0.51  | crystal-298K            |
|          | 515                 | 113.51    | 0.27 0.43  | CH <sub>3</sub> CN-298K |

**Table S5.** The luminescence lifetimes of ligand **L** and complexes **1–5** in the solid state and acetonitrile solution at 298 K and 77 K.

| Complex  | $\tau_1$ ( $\mu$ s) | $A_1$ (%) | $\tau_2$ ( $\mu$ s) | $A_2$ (%) | $\tau^a$ ( $\mu$ s) | Conditions              |
|----------|---------------------|-----------|---------------------|-----------|---------------------|-------------------------|
| <b>L</b> | 1.15                | 55.09     | 9.38                | 44.91     | 8.30                | crystal-298K            |
|          | 1.05                | 61.28     | 7.78                | 38.72     | 6.60                | CH <sub>3</sub> CN-298K |
| <b>1</b> | 1.19                | 57.57     | 10.78               | 42.43     | 9.53                | crystal-298K            |
|          | 1.28                | 55.91     | 10.87               | 44.09     | 9.62                | powder-298K             |
|          | 1.18                | 47.24     | 9.84                | 52.76     | 9.00                | CH <sub>3</sub> CN-298K |
|          | 1.07                | 22.52     | 11.76               | 77.48     | 11.48               | powder-77K              |
|          | 0.96                | 32.14     | 11.54               | 67.86     | 11.26               | crystal-77K             |
| <b>2</b> | 1.05                | 55.82     | 10.49               | 44.18     | 9.43                | crystal-298K            |
|          | 1.04                | 65.99     | 8.11                | 34.01     | 6.70                | CH <sub>3</sub> CN-298K |
| <b>3</b> | 1.01                | 53.84     | 9.41                | 46.16     | 8.48                | crystal-298K            |
|          | 1.09                | 61.18     | 8.36                | 38.82     | 7.12                | CH <sub>3</sub> CN-298K |
| <b>4</b> | 1.13                | 56.05     | 9.50                | 43.95     | 8.40                | crystal-298K            |
|          | 1.08                | 59.09     | 8.18                | 40.91     | 7.04                | CH <sub>3</sub> CN-298K |
| <b>5</b> | 1.18                | 56.33     | 9.66                | 43.67     | 8.51                | cyrstal-298K            |
|          | 0.87                | 67.88     | 6.80                | 32.12     | 5.54                | CH <sub>3</sub> CN-298K |

$$^a \tau = \frac{\tau_1^2 A_1 \% + \tau_2^2 A_2 \%}{\tau_1 A_1 \% + \tau_2 A_2 \%}$$

**Table S6.** Luminescence data for **1** in different state.

| Complex  | $\lambda_{em}$ (nm) | Intensity | $\tau$ ( $\mu$ s) | FWHM (nm) | CIE (x, y) | Conditions   |
|----------|---------------------|-----------|-------------------|-----------|------------|--------------|
| <b>1</b> | 518                 | 34590     | 9.53              | 78.3      | 0.25 0.51  | crystal-298K |
|          | 520                 | 49384     | 9.62              | 67.0      | 0.32 0.62  | powder-298K  |
|          | 532                 | 76306     | 11.26             | 61.0      | 0.34 0.65  | crystal-77K  |
|          | 537                 | 95065     | 11.48             | 51.4      | 0.34 0.64  | powder-77K   |

**Table S7.** Luminescence data for **1** and **1-PMMA**.

|                   | Excitation<br>( $\lambda$ , nm) | Emission<br>( $\lambda_{max}$ , nm) | Intensity | Lifetimes ( $\mu$ s) |           |                     |           |                     |
|-------------------|---------------------------------|-------------------------------------|-----------|----------------------|-----------|---------------------|-----------|---------------------|
|                   |                                 |                                     |           | $\tau_1$ ( $\mu$ s)  | $A_1$ (%) | $\tau_2$ ( $\mu$ s) | $A_2$ (%) | $\tau^a$ ( $\mu$ s) |
| <b>1</b>          | 365                             | 497                                 | 49384     | 1.19                 | 57.57     | 10.78               | 42.43     | 9.53                |
| <b>1-1%PMMA</b>   | 365                             | 520                                 | 31589     | 1.39                 | 50.91     | 10.45               | 49.09     | 9.35                |
| <b>1-1.2%PMMA</b> | 365                             | 521                                 | 132602    | 1.12                 | 29.90     | 10.63               | 70.10     | 10.22               |
| <b>1-1.4%PMMA</b> | 365                             | 509                                 | 358185    | 0.96                 | 42.14     | 11.54               | 57.86     | 10.94               |
| <b>1-1.6%PMMA</b> | 365                             | 520                                 | 973106    | 0.99                 | 51.74     | 12.87               | 48.26     | 11.96               |
| <b>1-1.8%PMMA</b> | 365                             | 520                                 | 729941    | 1.40                 | 56.80     | 11.19               | 43.20     | 9.81                |
| <b>1-2%PMMA</b>   | 365                             | 520                                 | 182758    | 1.49                 | 55.31     | 10.83               | 44.69     | 9.47                |
| <b>1-2.2%PMMA</b> | 365                             | 521                                 | 31589     | 1.24                 | 51.97     | 10.51               | 48.03     | 9.46                |
